# Supplementary material for: Prediction Error Representation in Individuals With Generalized Anxiety Disorder During Passive Avoidance
Source: Atypon-hosted journal article supplement (doi:10.1176/appi.ajp.2016.15111410), 2016-09-15
Supplement: appi.ajp.2016.15111410.ds001.pdf [file appi.ajp.2016.15111410.ds001.pdf]

### *Supplemental Methods*

#### *Model-fitting.*

A reinforcement-based learning model was fit to the choice data of the participants to determine two free parameters: the learning rate and the inverse temperature (procedures were adjusted from Averbeck et al., 2013; Costa, Tran, Turchi, & Averbeck, 2014). On every trial during the passive avoidance task, participants had the choice to either approach or avoid an object. At the start of the task, the value,  $V$ , for each stimulus,  $i$ , was set to 0. The prediction error,  $PE$ , was calculated using the feedback,  $F$  [coded 1 (\$5 reward), 0.2 (\$2), -0.2 (\$2 loss) or -1 (\$5 loss)], and the value,  $V$ , for the stimulus via the following formula:

$$PE(t) = F(t) - V_i(t)$$

where  $t$  indicates the current trial and  $i$  the stimulus. The value of the stimulus was updated using the value of the stimulus from the previous trial plus the prediction error of the previous trial multiplied by the learning rate  $\alpha$  via the following formula:

$$V_i(t) = V_i(t - 1) + \alpha PE(t - 1)$$

Of note, participants only received feedback when they approached an object and the value,  $V$ , of a stimulus was not updated when they chose to avoid that stimulus. The free parameters of the model, the learning rate  $\alpha$  and the inverse temperature  $\beta$ , were estimated through nonlinear optimization. This was done by maximizing the likelihood of the actual choices of participants to approach or avoid each stimulus. The probability,  $P$ , of approaching a stimulus  $i$ , given its value,  $V$ , was calculated using the softmax rule:

$$P_i(t) = \frac{e^{\beta V_i(t)}}{1 + e^{\beta V_i(t)}}$$

The log-likelihood was then calculated as follows:

$$LL = \sum_{t=1}^T \log[c_k(t)P_i(t) + (1 - c_k(t))(1 - P_i(t))]$$

where  $c_k = 1$  when a participant approached stimulus  $i$  in trial  $t$  and  $c_k = 0$  when a subject avoided stimulus  $i$  and  $T$  is the total number of trials. The negative log-likelihood was minimized using `fminsearch` in Matlab. The initial values of  $\alpha$  were drawn from the standard uniform distribution on the open interval  $(0, 1)$ . The initial values of  $\beta$  were drawn from the standard uniform distribution. The model fit was repeated 100 times, each time with different initial values for the free parameters drawn from these distributions. The values of the free parameters were set at the value for which the iteration resulted in the minimum log-likelihood.

The overall free parameters across the group ( $\alpha$  and  $\beta$ ) were then calculated by taking the average across all individually estimated  $\alpha$  and  $\beta$  parameters. These parameters were then used for all participants.

### *Supplemental Results*

The group analysis of the BOLD data was performed on the un-modulated regression coefficients from individual subject analyses. The un-modulated coefficients were entered into a 2 (diagnosis: Generalized Anxiety Disorder, healthy controls) by 2 (choice: approach, refuse) ANOVA in the choice-phase and a 2 (diagnosis: Generalized Anxiety Disorder, healthy controls) by 2 (feedback type: reward, punishment) in the feedback-phase.

#### *Supplemental Results 1.1: Un-modulated Choice-Phase Data*

*Diagnosis-by-Choice Interaction.* A significant diagnosis-by-choice interaction was observed for the un-modulated choice-phase data in right superior temporal gyrus (Table S1).

Patients with Generalized Anxiety Disorder showed reduced activation relative to healthy controls when not choosing an object [ $t=2.529$ ,  $p=.014$ ], but the groups did not differ when choosing objects [ $t=1.597$ ,  $p=.114$ ].

*Main Effect of Diagnosis.* A significant main effect of diagnosis was observed in left culmen (Table S1). Patients with Generalized Anxiety Disorder showed greater activation relative to healthy controls.

*Main Effect of Choice.* Significant main effects of choice were observed in regions including dorsomedial frontal cortex, right superior frontal gyrus, two regions of rostral anterior cingulate gyrus, superior temporal gyrus, left middle temporal gyrus and left inferior parietal cortex (Table S1). In left inferior parietal cortex, dorsomedial frontal cortex and both regions of rostral anterior cingulate cortex, greater activation was observed when choosing relative to not choosing objects. In right superior frontal gyrus, superior temporal gyrus and left middle temporal gyrus, greater activation was observed when not choosing relative to choosing objects.

#### Supplemental Results 1.2: Un-Modulated Feedback Data

*Diagnosis-by-Feedback Type Interaction.* No regions showed a significant diagnosis-by-feedback type interaction.

*Main Effect of Diagnosis.* A significant main effect of diagnosis was observed in regions including left medial frontal gyrus, left inferior frontal gyrus, bilateral putamen, left posterior cingulate cortex, right cingulate gyrus, right middle temporal gyrus, two regions of left middle temporal gyrus and left supramarginal gyrus (Table S2). In all regions, patients with Generalized Anxiety Disorder showed greater activation relative to healthy controls.

*Main Effect of Feedback Type.* Regions showing a significant main effect of feedback type included dorsomedial frontal cortex, bilateral medial frontal gyrus, bilateral lateral frontal

cortex, left orbitofrontal cortex, bilateral ventral striatum, bilateral anterior insula cortex, right insula cortex, left posterior cingulate cortex, left middle temporal gyrus, left temporal pole and right inferior parietal lobule (Table S2). Greater activation to reward relative to punishment was observed in bilateral lateral frontal cortex, left orbitofrontal cortex, bilateral ventral striatum, right insula cortex, left posterior cingulate cortex, left middle temporal gyrus and right inferior parietal lobule. Greater activation to punishment relative to reward was observed in dorsomedial frontal cortex, bilateral medial frontal gyrus, bilateral anterior insula cortex and left temporal pole.

*Supplemental Results 2.0: Modulated Choice-Phase Data-Supplemental Analysis.*

The group analysis of the BOLD data was performed on the modulated regression coefficients from individual subject analyses. The modulated coefficients were entered into a 2 (diagnosis: Generalized Anxiety Disorder, healthy controls) by 2 (choice: approach, refuse) ANOVA in the choice-phase and a 2 (diagnosis: Generalized Anxiety Disorder, healthy controls) by 2 (feedback type: reward, punishment) in the feedback-phase.

Given our a priori hypotheses regarding ventromedial prefrontal cortex and striatum, an additional analysis at a more lenient threshold ( $p=.02$ ) was conducted examining these regions. This revealed a significant main effect of diagnosis within ventromedial prefrontal cortex (see Table S3) where patients with Generalized Anxiety Disorder showed reduced BOLD response modulated by EV relative to HCs. Furthermore, significant diagnosis-by-choice interactions were observed within ventromedial prefrontal cortex, ventral striatum and caudate. In ventromedial prefrontal cortex, patients with Generalized Anxiety Disorder failed to show the typical drop in activation modulated by EV when not choosing objects [ $t=2.713$ ,  $p=.008$ ], though the groups did not significantly differ in modulated activation when choosing objects [ $t=.465$ ,  $p=.643$ ]. In

striatum and caudate, patients with Generalized Anxiety Disorder showed reduced activation modulated by EV when not choosing objects [ $t= 2.400$  &  $3.181$  respectively,  $p<.019$ ], though significant differences were not observed when choosing objects [ $t= 1.168$  &  $.543$  respectively,  $p>.247$ ].

*Supplemental Results 3.1: Choice-Phase Data Modulated by Expectancies of Reinforcement*

The group analysis of the BOLD data was performed on the modulated regression coefficients from individual subject analyses. The modulated coefficients were entered into a 2 (diagnosis: Generalized Anxiety Disorder, healthy controls) by 2 (choice: approach, refuse) ANOVA in the choice-phase and a 2 (diagnosis: Generalized Anxiety Disorder, healthy controls) by 2 (feedback type: reward, punishment) in the feedback-phase.

*Main Effect of Choice.* Significant main effects of choice were observed in regions including bilateral anterior insula cortex, dorsomedial prefrontal cortex/dorsal anterior cingulate cortex and bilateral visual cortex (Table S4). Significantly greater modulated activation was observed when choosing relative to refusing an object in bilateral visual cortex. Significantly greater modulated activation was seen when refusing an object relative to choosing an object in all other regions.

*Supplemental Results 3.2: Feedback Data Modulated by PE*

*Main Effect of Feedback Type.* Regions showing a significant main effect of feedback type included bilateral anterior insula cortex /inferior frontal gyrus and thalamus (Table S4). All regions showed increased modulated activation to reward relative to punishment feedback.

*Supplemental Results 4.0: Examining impairment in individuals with Generalized Anxiety Disorder and individuals with Generalized Anxiety Disorder+Social Anxiety Disorder separately relative to healthy individuals*

To ensure that the group differences detailed above of individuals with Generalized Anxiety Disorder relative to healthy comparison adults was not driven only by individuals who only presented with Generalized Anxiety Disorder or only those individuals who were comorbid for Generalized Anxiety Disorder and Social Anxiety Disorder, we conducted two further ANOVAs: one 2(diagnosis: Generalized Anxiety Disorder only, healthy controls) by 2(feedback type: reward, punishment) and one 2(diagnosis: Generalized Anxiety Disorder+Social Anxiety Disorder, healthy controls) by 2(feedback type: reward, punishment). These revealed very similar results whether the performance of healthy individuals was contrasted against individuals with Generalized Anxiety Disorder or individuals with Generalized Anxiety Disorder+Social Anxiety Disorder. The analysis contrasting healthy controls and participants with Generalized Anxiety Disorder+Social Anxiety Disorder replicated the findings from the original analysis in the diagnosis-by-feedback type interaction and in the main effect of diagnosis in all regions at the FWE corrected threshold. When the analysis was conducted comparing healthy controls and participants with Generalized Anxiety Disorder, the findings from the original analysis were replicated in the main effect of diagnosis in all regions at the FWE corrected threshold with the exception of the ventral striatum. However, this result was significant at only a slightly less stringent threshold ( $p=.006$ ). With respect to the diagnosis-by-feedback type interaction, the lentiform nucleus/putamen results were also present though at a less stringent threshold (left lentiform/putamen,  $p=.015$ , right lentiform/putamen,  $p=.034$ ).

TABLE S1. Brain Regions Demonstrating Differential Un-Modulated BOLD Response During the Choice-Phase of a Passive Avoidance Task in 32 Healthy Comparison Individuals and 46 Patients with Generalized Anxiety Disorder

| Region <sup>a</sup>                    | Coordinates of Peak Activation <sup>b</sup> |    |       |       |       |       | F      | p    | Voxels |
|----------------------------------------|---------------------------------------------|----|-------|-------|-------|-------|--------|------|--------|
|                                        | Left/Right                                  | BA | x     | y     | z     |       |        |      |        |
| <u>Diagnosis-by-Choice Interaction</u> |                                             |    |       |       |       |       |        |      |        |
| superior temporal gyrus                | Right                                       | 38 | 43.5  | 22.5  | -15.5 | 13.45 | .0005  | 20   |        |
| <u>Main Effect of Diagnosis</u>        |                                             |    |       |       |       |       |        |      |        |
| culmen                                 | Left                                        |    | -1.5  | -52.5 | -9.5  | 12.22 | .0008  | 21   |        |
| <u>Main Effect of Choice</u>           |                                             |    |       |       |       |       |        |      |        |
| mid-line structures                    |                                             |    | -16.5 | -49.5 | -21.5 | 100.0 | <.0001 | 7527 |        |
| <i>striatum/thalamus*</i>              | Left                                        |    | -7.5  | -19.5 | 5.5   | 100.0 | <.0001 | 2890 |        |
| <i>cingulate gyrus*</i>                | Left                                        |    | -1.5  | 1.5   | 35.5  | 73.38 | <.0001 | 372  |        |
| <i>culmen*</i>                         | Left                                        |    | -16.5 | -49.5 | -21.5 | 100.0 | <.0001 | 372  |        |
| <i>culmen*</i>                         | Right                                       |    | 22.5  | -55.5 | -21.5 | 43.04 | <.0001 | 97   |        |
| <i>culmen*</i>                         | Right                                       |    | 19.5  | -52.5 | -6.5  | 34.34 | <.0001 | 43   |        |
| dorsomedial frontal cortex             | Right                                       | 8  | 7.5   | 34.5  | 38.5  | 16.83 | .0001  | 27   |        |
| superior frontal gyrus                 | Right                                       | 8  | 31.5  | 22.5  | 50.5  | 23.27 | .0001  | 157  |        |
| rostral anterior cingulate gyrus       | Right                                       | 32 | 10.5  | 28.5  | 20.5  | 16.03 | .0001  | 60   |        |
| rostral anterior cingulate gyrus       | Right                                       | 32 | 1.5   | 40.5  | 8.5   | 13.15 | .0005  | 20   |        |
| superior temporal gyrus                | Right                                       | 22 | 61.5  | -28.5 | 5.5   | 28.98 | <.0001 | 348  |        |
| middle temporal gyrus                  | Left                                        | 39 | -43.5 | -70.5 | 11.5  | 13.52 | .0004  | 38   |        |
| inferior parietal                      | Left                                        | 40 | -46.5 | -31.5 | 41.5  | 100.1 | <.0001 | 1115 |        |
| middle occipital gyrus                 | Right                                       | 18 | 28.5  | -82.5 | -9.5  | 40.64 | <.0001 | 207  |        |
| middle occipital gyrus                 | Left                                        | 19 | -25.5 | -82.5 | -9.5  | 38.24 | <.0001 | 99   |        |
| culmen/parahippocampal                 | Right                                       | 19 | 19.5  | -52.5 | -6.5  | 34.34 | <.0001 | 133  |        |
| paracentral lobule                     | Left                                        | 6  | -7.5  | -31.5 | 53.5  | 28.00 | <.0001 | 116  |        |
| cuneus                                 | Right                                       | 18 | 7.5   | -73.5 | 20.5  | 15.72 | .0002  | 53   |        |
| culmen                                 | Left                                        | 19 | -13.5 | -61.5 | -3.5  | 16.12 | .0001  | 25   |        |

<sup>a</sup> According to the Talairach Daemon Atlas (<http://www.nitrc.org/projects/tal-daemon/>).

<sup>b</sup> Based on the Tournoux & Talairach standard brain template, BA= Brodmann's Area

\* indicates local maxima at  $p=.0001$

TABLE S2. Brain Regions Demonstrating Differential Un-Modulated BOLD Response During the Feedback-Phase of a Passive Avoidance Task in 32 Healthy Comparison Individuals and 46 Patients with Generalized Anxiety Disorder

| Region <sup>a</sup>                 | Coordinates of Peak Activation <sup>b</sup> |       |       |       |       |       | F      | p   | Voxels |
|-------------------------------------|---------------------------------------------|-------|-------|-------|-------|-------|--------|-----|--------|
|                                     | Left/Right                                  | BA    | x     | y     | z     |       |        |     |        |
| <u>Main Effect of Diagnosis</u>     |                                             |       |       |       |       |       |        |     |        |
| medial frontal gyrus                | Left                                        | 6     | -7.5  | 43.5  | 35.5  | 18.25 | <.0001 | 41  |        |
| inferior frontal gyrus              | Left                                        | 46    | -49.5 | 28.5  | 14.5  | 15.61 | .0002  | 30  |        |
| putamen                             | Left                                        |       | -34.5 | -28.5 | 8.5   | 20.84 | <.0001 | 439 |        |
| putamen                             | Right                                       |       | 28.5  | 4.5   | -0.5  | 16.30 | .0001  | 133 |        |
| posterior cingulate cortex          | Left                                        | 29    | -7.5  | -46.5 | 17.5  | 16.83 | .0001  | 60  |        |
| cingulate gyrus                     | Right                                       | 31    | 7.5   | -22.5 | 41.5  | 15.61 | .0002  | 34  |        |
| middle temporal gyrus               | Right                                       | 21    | 55.5  | 1.5   | -6.5  | 16.08 | .0001  | 54  |        |
| middle temporal gyrus               | Left                                        | 38    | -49.5 | 1.5   | -15.5 | 19.15 | <.0001 | 46  |        |
| middle temporal gyrus               | Left                                        | 21    | -49.5 | -43.5 | 5.5   | 13.35 | .0005  | 27  |        |
| supramarginal gyrus                 | Left                                        | 40    | -55.5 | -46.5 | 26.5  | 14.39 | .0003  | 37  |        |
| precentral gyrus                    | Right                                       | 4     | 40.5  | -13.5 | 38.5  | 15.34 | .0002  | 22  |        |
| postcentral gyrus                   | Left                                        | 43    | -55.5 | -7.5  | 14.5  | 12.80 | .0006  | 18  |        |
| paracentral lobule                  | Left                                        | 5     | -22.5 | -40.5 | 47.5  | 11.11 | .0013  | 22  |        |
| lingual gyrus                       | Right                                       | 17    | 7.5   | -91.5 | -0.5  | 12.39 | .0007  | 20  |        |
| precuneus                           | Right                                       | 7     | 4.5   | -37.5 | 47.5  | 13.05 | .0005  | 76  |        |
| <u>Main Effect of Feedback Type</u> |                                             |       |       |       |       |       |        |     |        |
| dorsomedial frontal cortex          | Left                                        | 9     | -7.5  | 40.5  | 26.5  | 100.0 | <.0001 | 28  |        |
| medial frontal gyrus                | Right                                       | 6     | 10.5  | 1.5   | 59.5  | 100.0 | <.0001 | 446 |        |
| medial frontal gyrus                | Left                                        | 9     | -22.5 | 34.5  | 26.5  | 100.0 | <.0001 | 53  |        |
| lateral frontal cortex              | Right                                       | 11    | 40.5  | 46.5  | 6.5   | 100.0 | <.0001 | 26  |        |
| lateral frontal cortex              | Left                                        | 46    | -40.5 | 46.5  | 5.5   | 100.0 | <.0001 | 18  |        |
| orbitofrontal cortex                | Left                                        | 11    | -19.5 | 43.5  | -9.5  | 100.0 | <.0001 | 19  |        |
| ventral striatum                    | Right                                       |       | 16.5  | 13.5  | -3.5  | 100.0 | <.0001 | 173 |        |
| ventral striatum                    | Left                                        |       | -10.5 | 13.5  | -3.5  | 100.0 | <.0001 | 137 |        |
| anterior insula cortex              | Right                                       | 44/13 | 40.5  | 7.5   | 5.5   | 100.0 | <.0001 | 109 |        |
| anterior insula cortex              | Left                                        | 13    | -37.5 | 7.5   | 8.5   | 100.0 | <.0001 | 85  |        |
| insula cortex                       | Right                                       | 13    | 34.5  | -4.5  | 14.5  | 100.0 | <.0001 | 24  |        |



|                            |       |    |       |       |       |       |        |     |
|----------------------------|-------|----|-------|-------|-------|-------|--------|-----|
| posterior cingulate cortex | Left  | 31 | -1.5  | -40.5 | 32.5  | 100.0 | <.0001 | 37  |
| middle temporal gyrus      | Left  | 37 | -55.5 | -49.5 | -9.5  | 100.0 | <.0001 | 834 |
| temporal pole              | Left  | 38 | -43.5 | 7.5   | -18.5 | 100.0 | <.0001 | 46  |
| inferior parietal lobule   | Right | 40 | 40.5  | -40.5 | 50.5  | 100.0 | <.0001 | 257 |
| middle occipital gyrus     | Right | 19 | 34.5  | -61.5 | 8.5   | 100.0 | <.0001 | 558 |
| parahippocampal gyrus      | Right | 19 | 28.5  | -40.5 | -0.5  | 100.0 | <.0001 | 46  |
| paracentral lobule         | Left  | 5  | -4.5  | -37.5 | 50.5  | 100.0 | <.0001 | 26  |
| cuneus                     | Right | 17 | 16.5  | -91.5 | 8.5   | 100.0 | <.0001 | 20  |
| precentral gyrus           | Right | 6  | 25.5  | -19.5 | 50.5  | 16.12 | .0001  | 18  |

<sup>a</sup> According to the Talairach Daemon Atlas (<http://www.nitrc.org/projects/tal-daemon/>).

<sup>b</sup> Based on the Tournoux & Talairach standard brain template, BA= Brodmann's Area

TABLE S3. Brain Regions Demonstrating Differential BOLD Response Modulated by Expected Value at  $p=.02$  During a Passive Avoidance Task in 32 Healthy Comparison Individuals and 46 Patients with Generalized Anxiety Disorder

| Region <sup>a</sup>                    | Coordinates of Peak Activation <sup>b</sup> |       |       |      |       | F     | p     | Voxels |
|----------------------------------------|---------------------------------------------|-------|-------|------|-------|-------|-------|--------|
|                                        | Left/Right                                  | BA    | x     | y    | z     |       |       |        |
| <u>Main Effect of Diagnosis</u>        |                                             |       |       |      |       |       |       |        |
| ventromedial prefrontal cortex         | Right                                       | 10    | 10.5  | 49.5 | -3.5  | 8.577 | .0045 | 25     |
| <u>Diagnosis-by-Choice Interaction</u> |                                             |       |       |      |       |       |       |        |
| ventromedial prefrontal cortex         | Right                                       | 10/11 | 7.5   | 40.5 | -12.5 | 9.173 | .0034 | 24     |
| caudate                                | Right                                       |       | 16.5  | 16.5 | 14.5  | 9.173 | .0034 | 12     |
| ventral striatum                       | Left                                        |       | -13.5 | 4.5  | -3.5  | 10.91 | .0015 | 15     |

<sup>a</sup> According to the Talairach Daemon Atlas (<http://www.nitrc.org/projects/tal-daemon/>).

<sup>b</sup> Based on the Tournoux & Talairach standard brain template, BA= Brodmann's Area

TABLE S4. Brain Regions Demonstrating Differential BOLD Response Modulated by Expected Value/Prediction Error During a Passive Avoidance Task in 32 Healthy Comparison Individuals and 46 Patients with Generalized Anxiety Disorder

| Region <sup>a</sup>                                          | Coordinates of Peak Activation <sup>b</sup> |       |       |       |      | F     | p      | Voxels |
|--------------------------------------------------------------|---------------------------------------------|-------|-------|-------|------|-------|--------|--------|
|                                                              | Left/Right                                  | BA    | x     | y     | z    |       |        |        |
| <u>Main Effect of Choice Modulated by Expected Value</u>     |                                             |       |       |       |      |       |        |        |
| dorsomedial frontal cortex                                   | Left                                        | 32    | -7.5  | 7.5   | 44.5 | 23.87 | <.0001 | 66     |
| anterior insula cortex                                       | Left                                        | 13    | -28.5 | 19.5  | 8.5  | 29.10 | <.0001 | 234    |
| anterior insula cortex                                       | Right                                       | 13    | 28.5  | 16.5  | -3.5 | 19.69 | <.0001 | 118    |
| cuneus/lingual gyrus                                         | Right                                       | 17    | 16.5  | -82.5 | 8.5  | 44.58 | <.0001 | 372    |
| cuneus/lingual gyrus                                         | Left                                        | 17    | -10.5 | -94.5 | 8.5  | 20.41 | <.0001 | 154    |
| <u>Main Effect of Feedback Modulated by Prediction Error</u> |                                             |       |       |       |      |       |        |        |
| AIC/iFG                                                      | Left                                        | 47/13 | -28.5 | 19.5  | -3.5 | 19.69 | <.0001 | 140    |
| AIC/iFG                                                      | Right                                       | 13/47 | 31.5  | 19.5  | -0.5 | 11.76 | .001   | 32     |
| Thalamus                                                     | Left                                        |       | -1.5  | -16.5 | 5.5  | 16.61 | .0001  | 36     |

<sup>a</sup> According to the Talairach Daemon Atlas (<http://www.nitrc.org/projects/tal-daemon/>).

<sup>b</sup> Based on the Tournoux & Talairach standard brain template, BA= Brodmann's Area  
AIC/iFG= anterior insula cortex/inferior frontal gyrus
